# Supplementary material for: Feasibility of an International Remote Simulation Training Program in Critical Care Delivery: A Pilot Study
Source: PubMed Central journal article supplement — Mayo Clin Proc Innov Qual Outcomes. 2018 Jul 31;2(3):229–33. doi: 10.1016/j.mayocpiqo.2018.06.008 (PMC6132209; doi:10.1016/j.mayocpiqo.2018.06.008), 2018-07-31

SUPPLEMENT FIGURE 1

Study Timeline and Screen capture of remote simulation training session

CERTAIN Study Timeline

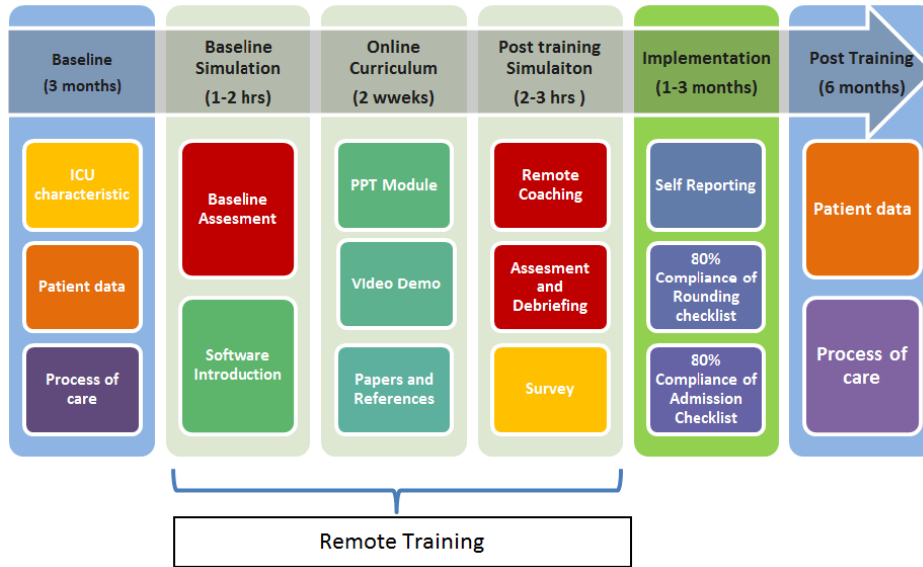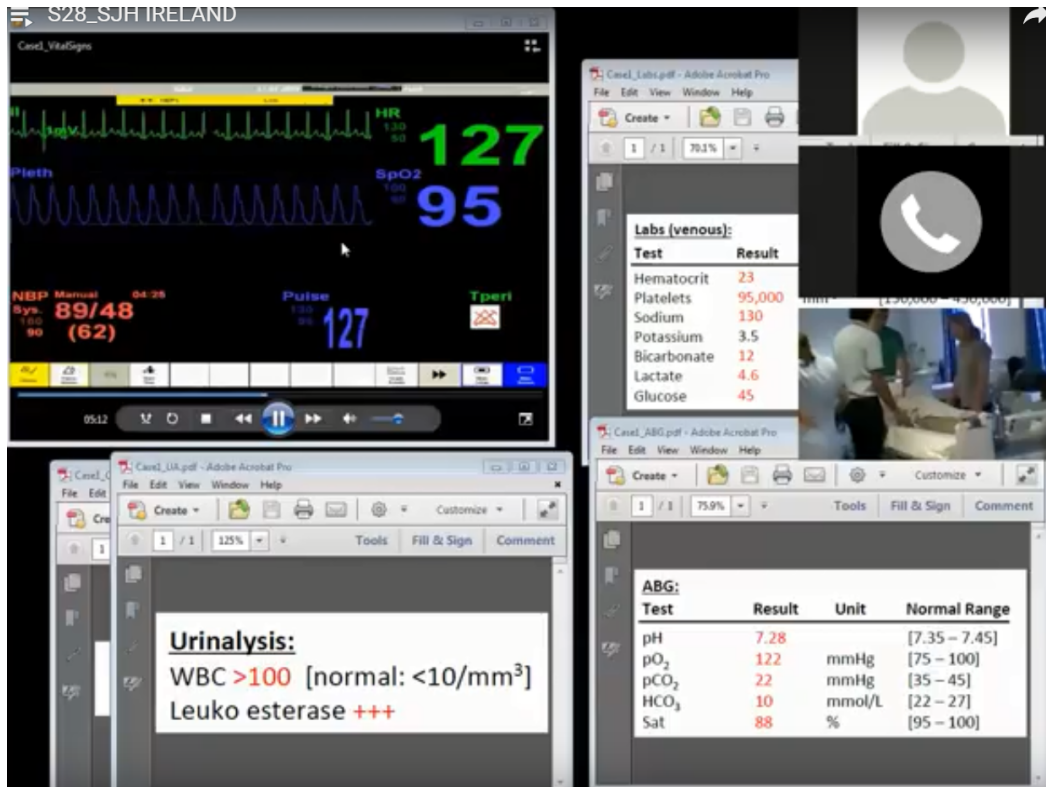

Supplement: mmc1.pdf [file mmc1.pdf]
