# Supplementary material for: Feasibility of an International Remote Simulation Training Program in Critical Care Delivery: A Pilot Study
Source: PubMed Central journal article supplement — Mayo Clin Proc Innov Qual Outcomes. 2018 Jul 31;2(3):229–33. doi: 10.1016/j.mayocpiqo.2018.06.008 (PMC6132209; doi:10.1016/j.mayocpiqo.2018.06.008), 2018-07-31
Supplement: mmc2.pdf [file mmc2.pdf]

|               |                 |               |     |          |          |       |          |           |
|---------------|-----------------|---------------|-----|----------|----------|-------|----------|-----------|
| Patient name: | Patient number: | Male / Female | Age | Ht. (cm) | Wt. (kg) | Date: | Time in: | Time out: |
|---------------|-----------------|---------------|-----|----------|----------|-------|----------|-----------|

|              |                             |                             |                             |                                           |                               |                      |                      |                      |                      |                      |                      |                      |                      |                      |                      |                      |
|--------------|-----------------------------|-----------------------------|-----------------------------|-------------------------------------------|-------------------------------|----------------------|----------------------|----------------------|----------------------|----------------------|----------------------|----------------------|----------------------|----------------------|----------------------|----------------------|
| Problem List | ↑ HR <input type="text"/> ↓ | ↑ BP <input type="text"/> ↓ | ↑ RR <input type="text"/> ↓ | ↑ SpO <sub>2</sub> <input type="text"/> ↓ | ↑ Temp <input type="text"/> ↓ | Pain (0-10)          | UO (ml)              |                      |                      |                      |                      |                      |                      |                      |                      |                      |
|              | ↑WBC↓                       | ↑Hb↓                        | ↑Pit↓                       | ↑INR↓                                     | ↑Glu↓                         | ↑Na↓                 | ↑K↓                  | ↑Ca↓                 | ↑pH ↓                | ↑PO <sub>2</sub> ↓   | ↑PCO <sub>2</sub> ↓  | ↑HCO <sub>3</sub> ↓  | ↑Lac↓                | ↑Billi↓              | ↑BUN ↓               | ↑Cr↓                 |
|              | <input type="text"/>        | <input type="text"/>        | <input type="text"/>        | <input type="text"/>                      | <input type="text"/>          | <input type="text"/> | <input type="text"/> | <input type="text"/> | <input type="text"/> | <input type="text"/> | <input type="text"/> | <input type="text"/> | <input type="text"/> | <input type="text"/> | <input type="text"/> | <input type="text"/> |

| Findings | History                                                                                                                                                                                                                                                                                                   | Code Status                                                                                                                                  | Allergies                                                                                                                                                                    | Home Medications                                                                                                                                    | Current Medications                                                                                                                                                                                                                                                                | Interventions                                                                                                                                                                                   |
|----------|-----------------------------------------------------------------------------------------------------------------------------------------------------------------------------------------------------------------------------------------------------------------------------------------------------------|----------------------------------------------------------------------------------------------------------------------------------------------|------------------------------------------------------------------------------------------------------------------------------------------------------------------------------|-----------------------------------------------------------------------------------------------------------------------------------------------------|------------------------------------------------------------------------------------------------------------------------------------------------------------------------------------------------------------------------------------------------------------------------------------|-------------------------------------------------------------------------------------------------------------------------------------------------------------------------------------------------|
|          | <input type="checkbox"/> Unknown<br><input type="checkbox"/> Previously healthy<br><input type="checkbox"/> CHF<br><input type="checkbox"/> Chronic lung disease<br><input type="checkbox"/> Chronic liver failure<br><input type="checkbox"/> Chronic renal failure<br><input type="checkbox"/> Diabetes | <input type="checkbox"/> Cancer<br><input type="checkbox"/> Chemotherapy<br><input type="checkbox"/> AIDS<br><input type="checkbox"/> Other: | <input type="checkbox"/> Full code<br><input type="checkbox"/> DNI<br><input type="checkbox"/> DNR<br><input type="checkbox"/> DNI & DNR<br><input type="checkbox"/> Unknown | <input type="checkbox"/> Unknown<br><input type="checkbox"/> No allergies<br><input type="checkbox"/> Penicillin<br><input type="checkbox"/> Other: | <input type="checkbox"/> Unknown<br><input type="checkbox"/> No medications<br><input type="checkbox"/> Opioids<br><input type="checkbox"/> Sedatives<br><input type="checkbox"/> Anticoagulants<br><input type="checkbox"/> Antihypertensives<br><input type="checkbox"/> Insulin | <input type="checkbox"/> Beta blockers<br><input type="checkbox"/> Steroids<br><input type="checkbox"/> Antibiotics<br><input type="checkbox"/> Chemotherapy<br><input type="checkbox"/> Other: |

**Rounding checklist: System based plan of care**

|                                                                                                                                                                                                                                                                        |                                                                                                                                                                                          |                                                                                                                                                                                                                                                                                               |                                                                                                                                                                                                                                              |                                                                                                                                                                                                                                                                                                                                |                                                                                                                                                                                             |                                                                                                                                                                                        |                                                                                                                                                                                                                                       |                                                                                                                                                                                       |                                                                                                                                                                                   |                                                                                                                                                                                   |                                                                                                                                                                                                                                         |                                                                                                                                                                                         |
|------------------------------------------------------------------------------------------------------------------------------------------------------------------------------------------------------------------------------------------------------------------------|------------------------------------------------------------------------------------------------------------------------------------------------------------------------------------------|-----------------------------------------------------------------------------------------------------------------------------------------------------------------------------------------------------------------------------------------------------------------------------------------------|----------------------------------------------------------------------------------------------------------------------------------------------------------------------------------------------------------------------------------------------|--------------------------------------------------------------------------------------------------------------------------------------------------------------------------------------------------------------------------------------------------------------------------------------------------------------------------------|---------------------------------------------------------------------------------------------------------------------------------------------------------------------------------------------|----------------------------------------------------------------------------------------------------------------------------------------------------------------------------------------|---------------------------------------------------------------------------------------------------------------------------------------------------------------------------------------------------------------------------------------|---------------------------------------------------------------------------------------------------------------------------------------------------------------------------------------|-----------------------------------------------------------------------------------------------------------------------------------------------------------------------------------|-----------------------------------------------------------------------------------------------------------------------------------------------------------------------------------|-----------------------------------------------------------------------------------------------------------------------------------------------------------------------------------------------------------------------------------------|-----------------------------------------------------------------------------------------------------------------------------------------------------------------------------------------|
|  <ul style="list-style-type: none"> <li><input type="checkbox"/> Sedation break</li> <li><input type="checkbox"/> Delirium</li> <li><input type="checkbox"/> Pain treatment</li> </ul> |  <ul style="list-style-type: none"> <li><input type="checkbox"/> Cardiovascular medications</li> </ul> |  <ul style="list-style-type: none"> <li><input type="checkbox"/> Lung protective vent.</li> <li><input type="checkbox"/> Spont. breathing trial</li> <li><input type="checkbox"/> Head elevation</li> </ul> |  <ul style="list-style-type: none"> <li><input type="checkbox"/> Fluid balance reviewed</li> <li><input type="checkbox"/> Electrolytes reviewed</li> </ul> |  <ul style="list-style-type: none"> <li><input type="checkbox"/> Glucose control</li> <li><input type="checkbox"/> Ulcer prophylaxis</li> <li><input type="checkbox"/> Nutrition</li> <li><input type="checkbox"/> Bowel protocol</li> </ul> |  <ul style="list-style-type: none"> <li><input type="checkbox"/> Venous thrombosis prophylaxis</li> </ul> |  <ul style="list-style-type: none"> <li><input type="checkbox"/> Antimicrobials reviewed</li> </ul> |  <ul style="list-style-type: none"> <li><input type="checkbox"/> Skin integrity</li> <li><input type="checkbox"/> Wound care reviewed</li> </ul> |  <ul style="list-style-type: none"> <li><input type="checkbox"/> Medications reviewed</li> </ul> |  <ul style="list-style-type: none"> <li><input type="checkbox"/> Devices reviewed</li> </ul> |  <ul style="list-style-type: none"> <li><input type="checkbox"/> Physical therapy</li> </ul> |  <ul style="list-style-type: none"> <li><input type="checkbox"/> Family present</li> <li><input type="checkbox"/> Goals of care/ Social</li> </ul> |  <ul style="list-style-type: none"> <li><input type="checkbox"/> Safe for ICU discharge</li> </ul> |
|------------------------------------------------------------------------------------------------------------------------------------------------------------------------------------------------------------------------------------------------------------------------|------------------------------------------------------------------------------------------------------------------------------------------------------------------------------------------|-----------------------------------------------------------------------------------------------------------------------------------------------------------------------------------------------------------------------------------------------------------------------------------------------|----------------------------------------------------------------------------------------------------------------------------------------------------------------------------------------------------------------------------------------------|--------------------------------------------------------------------------------------------------------------------------------------------------------------------------------------------------------------------------------------------------------------------------------------------------------------------------------|---------------------------------------------------------------------------------------------------------------------------------------------------------------------------------------------|----------------------------------------------------------------------------------------------------------------------------------------------------------------------------------------|---------------------------------------------------------------------------------------------------------------------------------------------------------------------------------------------------------------------------------------|---------------------------------------------------------------------------------------------------------------------------------------------------------------------------------------|-----------------------------------------------------------------------------------------------------------------------------------------------------------------------------------|-----------------------------------------------------------------------------------------------------------------------------------------------------------------------------------|-----------------------------------------------------------------------------------------------------------------------------------------------------------------------------------------------------------------------------------------|-----------------------------------------------------------------------------------------------------------------------------------------------------------------------------------------|
