# Supplementary material for: Feasibility of an International Remote Simulation Training Program in Critical Care Delivery: A Pilot Study
Source: PubMed Central journal article supplement — Mayo Clin Proc Innov Qual Outcomes. 2018 Jul 31;2(3):229–33. doi: 10.1016/j.mayocpiqo.2018.06.008 (PMC6132209; doi:10.1016/j.mayocpiqo.2018.06.008), 2018-07-31
Supplement: mmc3.pdf [file mmc3.pdf]

|               |                 |               |     |          |          |       |          |           |
|---------------|-----------------|---------------|-----|----------|----------|-------|----------|-----------|
| Patient name: | Patient number: | Male / Female | Age | Ht. (cm) | Wt. (kg) | Date: | Time in: | Time out: |
|---------------|-----------------|---------------|-----|----------|----------|-------|----------|-----------|

|                                                                          |
|--------------------------------------------------------------------------|
| <input type="checkbox"/> COPD/Asthma                                     |
| <input type="checkbox"/> Pneumonia                                       |
| <input type="checkbox"/> Pulmonary edema                                 |
| <input type="checkbox"/> Pneumothorax                                    |
| <input type="checkbox"/> ARDS                                            |
| <input type="checkbox"/> Other: <input style="width:50px;" type="text"/> |

|                                                                          |
|--------------------------------------------------------------------------|
| <input type="checkbox"/> ACS                                             |
| <input type="checkbox"/> Shock                                           |
| <input type="checkbox"/> Hypertension                                    |
| <input type="checkbox"/> Cardiac Arrest                                  |
| <input type="checkbox"/> Tachyarrhythmia<br>Bradyarrhythmia              |
| <input type="checkbox"/> Other: <input style="width:50px;" type="text"/> |

|                                                                          |
|--------------------------------------------------------------------------|
| <input type="checkbox"/> Coma                                            |
| <input type="checkbox"/> TBI                                             |
| <input type="checkbox"/> Stroke                                          |
| <input type="checkbox"/> Anxiety                                         |
| <input type="checkbox"/> Status Epilepticus                              |
| <input type="checkbox"/> Other: <input style="width:50px;" type="text"/> |

|                                                                          |
|--------------------------------------------------------------------------|
| <input type="checkbox"/> Acute abdomen                                   |
| <input type="checkbox"/> GI bleeding                                     |
| <input type="checkbox"/> Liver failure                                   |
| <input type="checkbox"/> Renal failure                                   |
| <input type="checkbox"/> DKA                                             |
| <input type="checkbox"/> VTE                                             |
| <input type="checkbox"/> Infection/Sepsis                                |
| <input type="checkbox"/> Other: <input style="width:50px;" type="text"/> |

|                                                 |                                                 |                                                 |                                                               |                                                   |                                                      |                                                  |
|-------------------------------------------------|-------------------------------------------------|-------------------------------------------------|---------------------------------------------------------------|---------------------------------------------------|------------------------------------------------------|--------------------------------------------------|
| ↑ HR <input style="width:50px;" type="text"/> ↓ | ↑ BP <input style="width:50px;" type="text"/> ↓ | ↑ RR <input style="width:50px;" type="text"/> ↓ | ↑ SpO <sub>2</sub> <input style="width:50px;" type="text"/> ↓ | ↑ Temp <input style="width:50px;" type="text"/> ↓ | Pain (0-10) <input style="width:50px;" type="text"/> | UO (ml) <input style="width:50px;" type="text"/> |
|-------------------------------------------------|-------------------------------------------------|-------------------------------------------------|---------------------------------------------------------------|---------------------------------------------------|------------------------------------------------------|--------------------------------------------------|

|            |                                            |                                      |                                            |             |                                       |                  |                                  |                                       |                                            |                                   |                                        |          |                                        |                                   |                                   |
|------------|--------------------------------------------|--------------------------------------|--------------------------------------------|-------------|---------------------------------------|------------------|----------------------------------|---------------------------------------|--------------------------------------------|-----------------------------------|----------------------------------------|----------|----------------------------------------|-----------------------------------|-----------------------------------|
| <b>A</b>   | <input type="checkbox"/> Airway compromise | <b>B</b>                             | <input type="checkbox"/> Poor air entry    | <b>C</b>    | <input type="checkbox"/> Sinus rhythm | <b>D</b>         | <input type="checkbox"/> Awake   | <b>E</b>                              | <input type="checkbox"/> Gastro Intestinal | <input type="checkbox"/> Bleeding |                                        |          |                                        |                                   |                                   |
|            | <input type="checkbox"/> Stridor           |                                      | <input type="checkbox"/> Crackles          |             | <input type="checkbox"/> ST changes   |                  | <input type="checkbox"/> Verbal  |                                       | <input type="checkbox"/> Abd. Distension   | <input type="checkbox"/> Skin     |                                        |          |                                        |                                   |                                   |
|            | <input type="checkbox"/> Wheezing          |                                      | <input type="checkbox"/> Work of breathing |             | <input type="checkbox"/> AV block     |                  | <input type="checkbox"/> Painful |                                       | <input type="checkbox"/> Peritoneal signs  | <input type="checkbox"/> Rash     |                                        |          |                                        |                                   |                                   |
| <b>HIV</b> |                                            | <b>TB</b>                            |                                            | <b>SARS</b> |                                       | <b>Influenza</b> |                                  | <b>C</b>                              |                                            | <b>D</b>                          |                                        | <b>E</b> |                                        |                                   |                                   |
| Incharge   |                                            | Physician:                           |                                            |             |                                       |                  |                                  |                                       |                                            | <b>C</b>                          |                                        | <b>D</b> |                                        | <b>E</b>                          |                                   |
|            |                                            | Nurse:                               |                                            |             |                                       |                  |                                  |                                       |                                            |                                   |                                        |          |                                        |                                   |                                   |
|            |                                            | Resident/Fellow:                     |                                            |             |                                       |                  |                                  |                                       |                                            |                                   |                                        |          |                                        |                                   |                                   |
|            |                                            | <input type="checkbox"/> Atrial fib. |                                            |             | <input type="checkbox"/> V tach       |                  |                                  | <input type="checkbox"/> Unresponsive |                                            |                                   | <input type="checkbox"/> Delirium      |          |                                        | <input type="checkbox"/> Diarrhea | <input type="checkbox"/> Wound    |
|            |                                            | <input type="checkbox"/> Weak pulse  |                                            |             | <input type="checkbox"/> Mottling     |                  |                                  | <input type="checkbox"/> Seizure      |                                            |                                   | <input type="checkbox"/> Focal deficit |          |                                        | <input type="checkbox"/> Vomiting | <input type="checkbox"/> Jaundice |
|            |                                            |                                      |                                            |             |                                       |                  |                                  | <input type="checkbox"/> Hematemesis  |                                            |                                   |                                        |          | <input type="checkbox"/> SC. emphysema | <input type="checkbox"/> Edema    |                                   |

|                                          |                                          |                                          |                                          |                                          |                                          |                                          |                                          |                                          |                                          |                                          |                                          |                                          |                                          |                                          |                                          |
|------------------------------------------|------------------------------------------|------------------------------------------|------------------------------------------|------------------------------------------|------------------------------------------|------------------------------------------|------------------------------------------|------------------------------------------|------------------------------------------|------------------------------------------|------------------------------------------|------------------------------------------|------------------------------------------|------------------------------------------|------------------------------------------|
| ↑WBC↓                                    | ↑Hb↓                                     | ↑Pit↓                                    | ↑INR↓                                    | ↑Glu↓                                    | ↑Na↓                                     | ↑K↓                                      | ↑Ca↓                                     | ↑pH↓                                     | ↑PO <sub>2</sub> ↓                       | ↑PCO <sub>2</sub> ↓                      | ↑HCO <sub>3</sub> ↓                      | ↑Lac↓                                    | ↑Billi↓                                  | ↑BUN↓                                    | ↑Cr↓                                     |
| <input style="width:40px;" type="text"/> |

| Reason for Admission                          |                                           | History                                        |                                           | Code Status                                | Allergies                                 | Medications                             |                                        |
|-----------------------------------------------|-------------------------------------------|------------------------------------------------|-------------------------------------------|--------------------------------------------|-------------------------------------------|-----------------------------------------|----------------------------------------|
| <input type="checkbox"/> Shortness of breath  | <input type="checkbox"/> Seizure          | <input type="checkbox"/> Unknown               | <input type="checkbox"/> Cancer           | <input type="checkbox"/> Full code         | <input type="checkbox"/> Unknown          | <input type="checkbox"/> Unknown        | <input type="checkbox"/> Beta blockers |
| <input type="checkbox"/> Altered mental state | <input type="checkbox"/> Focal deficit    | <input type="checkbox"/> Previously healthy    | <input type="checkbox"/> Chemotherapy     | <input type="checkbox"/> DNI               | <input type="checkbox"/> No allergies     | <input type="checkbox"/> No medications | <input type="checkbox"/> Steroids      |
| <input type="checkbox"/> Chest pain           | <input type="checkbox"/> Postoperative    | <input type="checkbox"/> CHF                   | <input type="checkbox"/> AIDS             | <input type="checkbox"/> DNR               | <input type="checkbox"/> Penicillin       | <input type="checkbox"/> Opioids        | <input type="checkbox"/> Antibiotics   |
| <input type="checkbox"/> Cardiac arrest       | <input type="checkbox"/> Other:           | <input type="checkbox"/> Chronic lung disease  | <input type="checkbox"/> Other:           | <input type="checkbox"/> DNI & DNR         | <input type="checkbox"/> Other:           | <input type="checkbox"/> Sedatives      | <input type="checkbox"/> Chemotherapy  |
| <input type="checkbox"/> Bleeding             | <input style="width:100px;" type="text"/> | <input type="checkbox"/> Chronic liver failure | <input style="width:100px;" type="text"/> | <input type="checkbox"/> Unknown           | <input style="width:100px;" type="text"/> | <input type="checkbox"/> Anticoagulants | <input type="checkbox"/> Other:        |
| <input type="checkbox"/> Hypotension          |                                           | <input type="checkbox"/> Chronic renal failure |                                           | <input type="checkbox"/> Antihypertensives |                                           |                                         |                                        |
| <input type="checkbox"/> Arrhythmia           |                                           | <input type="checkbox"/> Diabetes              |                                           | <input type="checkbox"/> Insulin           |                                           |                                         |                                        |

| Findings | Medication/Interventions | Ordered | Completed | Medication/Interventions | Ordered | Completed |
|----------|--------------------------|---------|-----------|--------------------------|---------|-----------|
| ECG:     |                          | :       | :         |                          | :       | :         |
| US:      |                          | :       | :         |                          | :       | :         |
| CXR:     |                          | :       | :         |                          | :       | :         |
| CT:      |                          | :       | :         |                          | :       | :         |
| Other:   |                          | :       | :         |                          | :       | :         |
|          |                          | :       | :         |                          | :       | :         |
|          |                          | :       | :         |                          | :       | :         |
|          |                          | :       | :         |                          | :       | :         |
|          |                          | :       | :         |                          | :       | :         |
|          |                          | :       | :         |                          | :       | :         |
|          |                          | :       | :         |                          | :       | :         |
|          |                          | :       | :         |                          | :       | :         |
|          |                          | :       | :         |                          | :       | :         |
|          |                          | :       | :         |                          | :       | :         |
|          |                          | :       | :         |                          | :       | :         |
|          |                          | :       | :         |                          | :       | :         |
|          |                          | :       | :         |                          | :       | :         |
|          |                          | :       | :         |                          | :       | :         |
|          |                          | :       | :         |                          | :       | :         |

**Whiteboard**
