# Supplementary material for: Feasibility of an International Remote Simulation Training Program in Critical Care Delivery: A Pilot Study
Source: PubMed Central journal article supplement — Mayo Clin Proc Innov Qual Outcomes. 2018 Jul 31;2(3):229–33. doi: 10.1016/j.mayocpiqo.2018.06.008 (PMC6132209; doi:10.1016/j.mayocpiqo.2018.06.008), 2018-07-31
Supplement: mmc4.pdf [file mmc4.pdf]

## SUPPLEMENT TABLE 1, Demographics of study participants

### Continent of Origin\*

|               |   |
|---------------|---|
| Asia          | 9 |
| Europe        | 5 |
| North America | 3 |
| South America | 1 |

### Countries of Origin

|          |                |
|----------|----------------|
| Brazil   | 1 <sup>^</sup> |
| China    | 3              |
| India    | 2              |
| Mexico   | 3              |
| Mongolia | 1 <sup>^</sup> |
| Saudi    | 3              |
| Serbia   | 5              |

<sup>^</sup>The sessions were done in a team of three clinicians, however only one clinician from these sites attended the both pre and post sessions. Other participants can only attend only either pre or post training session due to shift changes. As we wanted to make sure we could perform a matched pair analysis, one clinician performance was used for analysis for above mentioned centers.

### Gender and professionals

|        | Physicians | Nurses | Total |
|--------|------------|--------|-------|
| Male   | 10         | 0      | 10    |
| Female | 6          | 2      | 8     |
