# Supplementary material for: Feasibility of an International Remote Simulation Training Program in Critical Care Delivery: A Pilot Study
Source: PubMed Central journal article supplement — Mayo Clin Proc Innov Qual Outcomes. 2018 Jul 31;2(3):229–33. doi: 10.1016/j.mayocpiqo.2018.06.008 (PMC6132209; doi:10.1016/j.mayocpiqo.2018.06.008), 2018-07-31
Supplement: mmc5.pdf [file mmc5.pdf]

**SUPPLEMENT TABLE 2, Participant Satisfaction, Confidence following Educational Intervention (n=16)**

| Survey Statement                                                                         | Response Score (%) |              |              |               |              |         |
|------------------------------------------------------------------------------------------|--------------------|--------------|--------------|---------------|--------------|---------|
|                                                                                          | 1                  | 2            | 3            | 4             | 5            |         |
| 1) CERTAIN approach helped me feel better prepared during the emergency scenario         | 0<br>(0%)          | 1<br>(6.3%)  | 0<br>(0%)    | 8<br>(50%)    | 7<br>(43.8%) | 4.3±0.8 |
| 2) CERTAIN software was easy to use                                                      | 0<br>(0%)          | 0<br>(0%)    | 2<br>(12.5%) | 10<br>(62.5%) | 4<br>(25%)   | 4.1±0.6 |
| 3) I would use CERTAIN approach if I were treating decompensating patient in a real life | 0<br>(0%)          | 0<br>(0%)    | 5<br>(31.3%) | 8<br>(50%)    | 3<br>(18.8%) | 3.9±0.7 |
| 4) CERTAIN did not disrupt clinical flow during simulated patient resuscitation          | 0<br>(0%)          | 1<br>(6.25%) | 5<br>(31.3%) | 8<br>(50%)    | 2<br>(12.5%) | 3.7±0.8 |
| 5) If I were a patient, I would want CERTAIN to be used by my doctors                    | 0<br>(0%)          | 1<br>(6.25%) | 2<br>(12.5%) | 7<br>(43.8%)  | 6<br>(37.5%) | 4.1±0.9 |
| 6) The remote scenarios were realistic                                                   | 0<br>(0%)          | 1<br>(6.25%) | 3<br>(18.8%) | 7<br>(43.8%)  | 5<br>(31.2%) | 4.0±0.9 |
| 7) I enjoyed the remote training session.                                                | 0<br>(0%)          | 0<br>(0%)    | 1<br>(6.25%) | 6<br>(37.5%)  | 9<br>(56.3%) | 4.5±0.6 |
| 8) The knowledge gained will be helpful to me in my practice.                            | 0<br>(0%)          | 0<br>(0%)    | 2<br>(12.5%) | 7<br>(43.8%)  | 7<br>(43.8%) | 4.3±0.7 |

---

|                                                                |      |         |         |         |         |         |
|----------------------------------------------------------------|------|---------|---------|---------|---------|---------|
| 9) I learned something new.                                    | 0    | 0       | 2       | 3       | 11      |         |
|                                                                | (0%) | (0%)    | (12.5%) | (18.8%) | (68.8%) | 4.6±0.7 |
| 10) This training session should be<br>taken by all ICU staff. | 0    | 1       | 2       | 3       | 10      |         |
|                                                                | (0%) | (6.25%) | (12.5%) | (18.8%) | (62.5%) | 4.4±1.0 |

---
